# Supplementary material
Source: MDPI journal article supplement (https://www.mdpi.com/2673-9992/14/1/130)

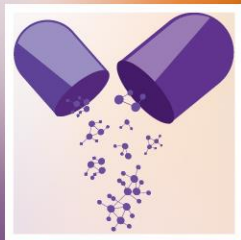

# The 8th International Electronic Conference on Medicinal Chemistry (ECMC 2022)

01-30 NOVEMBER 2022 | ONLINE

## Patient-centric drug product design: case studies for special populations

Chaired by **DR. ALFREDO BERZAL-HERRANZ**;  
Co-Chaired by **PROF. DR. MARIA EMÍLIA SOUSA**

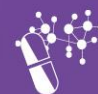

*pharmaceuticals*

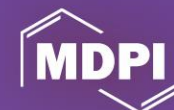

### Isabel Martins de Almeida

MedTech, UCIBIO, REQUIMTE & Associate Laboratory i4HB - Institute for Health and Bioeconomy

Laboratory of Pharmaceutical Technology, Department of Drug Sciences, Faculty of Pharmacy, University of Porto, Rua Jorge Viterbo Ferreira 228, Porto, Portugal;

\* Corresponding author: ifalmeida@ff.up.pt

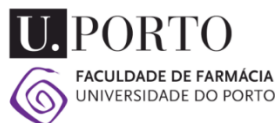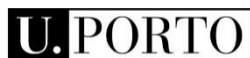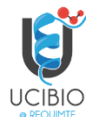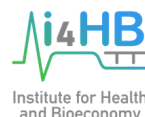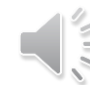

# Patient-centric drug product design: case studies for special populations

## Graphical Abstract

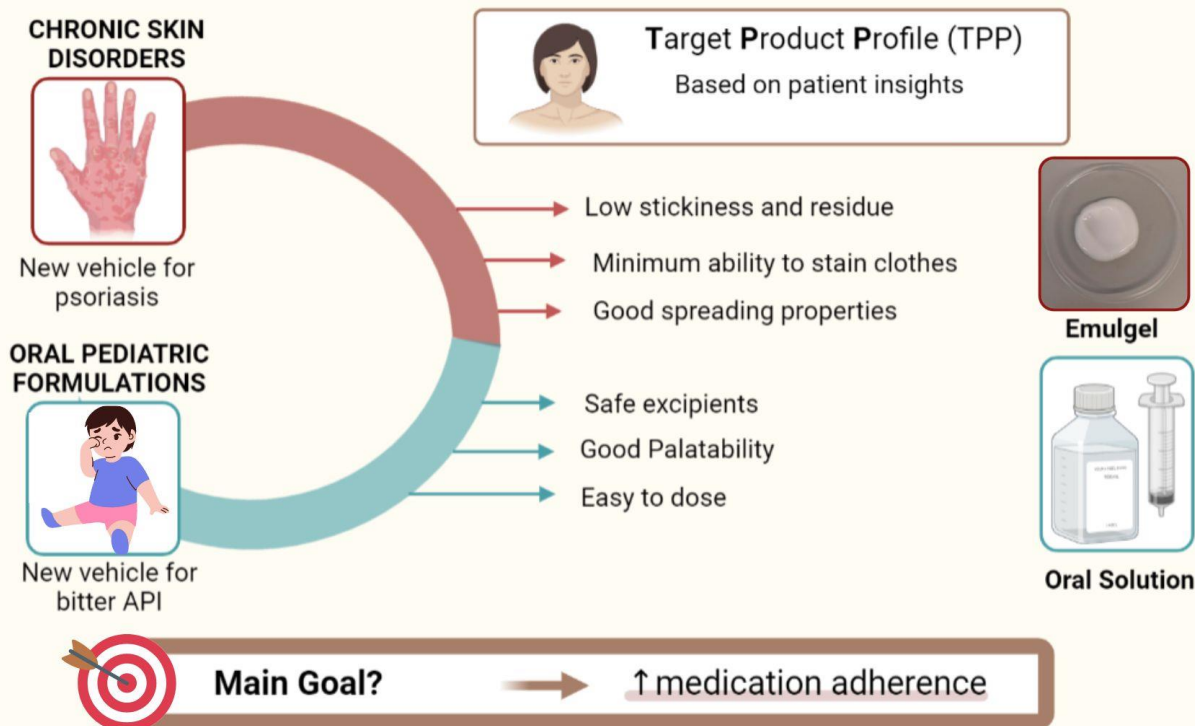

## **Abstract:**

Medication non-adherence poses considerable challenges in managing chronic diseases and is associated with almost 200,000 deaths and €80-125 billion of potentially preventable direct (e.g. hospitalizations, waste of medication) and indirect (e.g. work productivity losses) costs in the European Union alone. The increasing awareness of the contribution of the acceptability of drug products by the patient to medication adherence and clinical outcomes is driving the integration of Patient Centric drug Product Design (PCDPD) into the pharmaceutical development process.

Regulatory agencies have addressed the relevancy of placing the patient in the center of pharmaceutical development. EMA has issued guideline/reflection papers for pediatric and older populations while FDA has developed a series of guidance documents on patient focused drug development with the primary goal to better incorporate the patient's voice in drug development and evaluation. PCDDP can be defined as the process of identifying the comprehensive needs of the target patient population to support the design of drug products. Three major factors are analyzed in PCDDP, namely patient, drug and drug product characteristics. This systematic approach integrates this insight which is translated to a Target Product Profile (TPP) to drive the pharmaceutical product design process. Two case studies will be presented focused on the pediatric population and on patients with a chronic skin disorder (psoriasis) which will highlight the roadmap for a successful PCDDP.

**Keywords:** Patient-centric design, medication adherence, pediatric formulations, dermatological formulations

**ECMC  
2022**

**The 8th International Electronic  
Conference on Medicinal Chemistry**  
01-30 NOVEMBER 2022 | ONLINE

## Introduction

# MEDICATION ADHERENCE

**50 %** adherence rate

Patients with chronic diseases in developed countries

**up to 80 %**

Topical treatments

**200,000** Premature deaths annually EU

**€80-125 billion**

Potentially preventable and indirect costs EU

van Boven JF, et al. European Network to Advance Best Practices and Technology on Medication Adherence: Mission Statement. Front Pharmacol. 2021, 12:748702.

World Health Organization. Adherence to long-term therapies: evidence for action. 2003. Available at: [http://www.who.int/chronic\\_conditions/adherencereport/en/](http://www.who.int/chronic_conditions/adherencereport/en/)

**ECMC  
2022**

**The 8th International Electronic  
Conference on Medicinal Chemistry**  
01-30 NOVEMBER 2022 | ONLINE

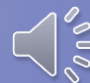

# Introduction

## DETERMINANTS OF MEDICATION ADHERENCE

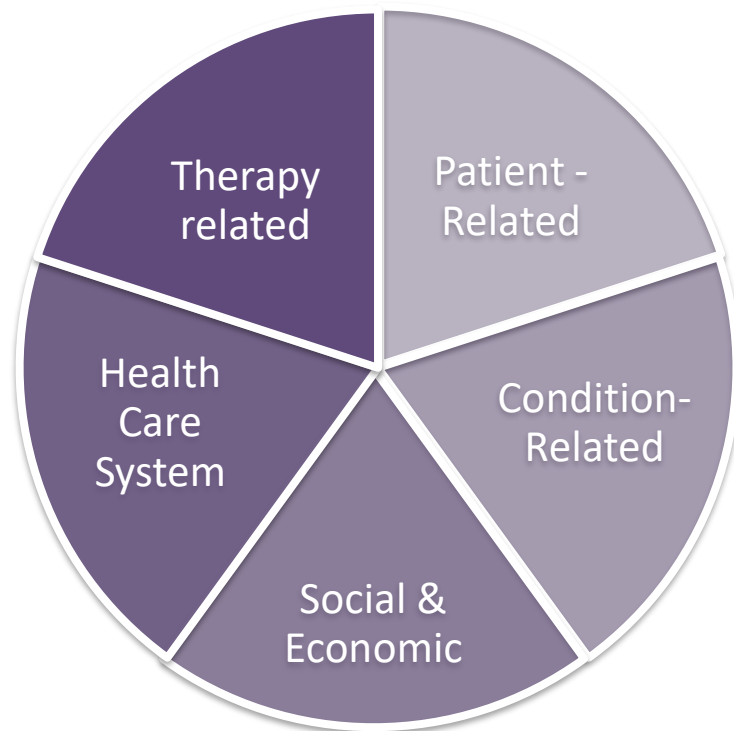

World Health Organization. Adherence to long-term therapies: evidence for action. 2003. Available at: [http://www.who.int/chronic\\_conditions/adherencereport/en/](http://www.who.int/chronic_conditions/adherencereport/en/)

**ECMC  
2022**

**The 8th International Electronic  
Conference on Medicinal Chemistry**  
01-30 NOVEMBER 2022 | ONLINE



# Introduction

## DETERMINANTS OF MEDICATION ADHERENCE

PATIENT CENTRIC DRUG  
PRODUCT DESIGN

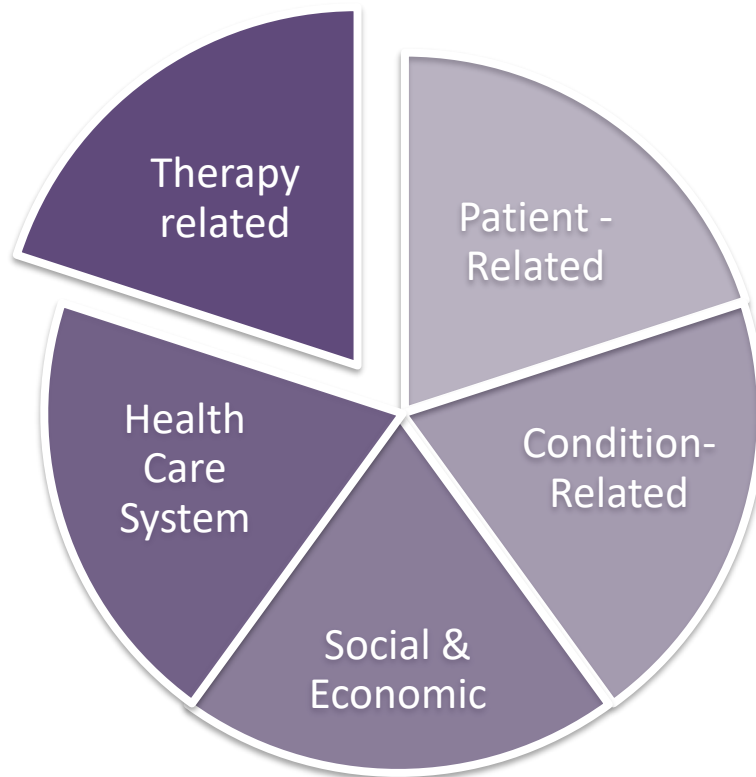

World Health Organization. Adherence to long-term therapies: evidence for action. 2003. Available at: [http://www.who.int/chronic\\_conditions/adherencereport/en/](http://www.who.int/chronic_conditions/adherencereport/en/)

ECMC  
2022

The 8th International Electronic  
Conference on Medicinal Chemistry  
01-30 NOVEMBER 2022 | ONLINE



## Introduction

What does *Patient centric drug product design* means?

ECMC  
2022

The 8th International Electronic  
Conference on Medicinal Chemistry  
01-30 NOVEMBER 2022 | ONLINE



# Introduction

“The process of *identifying the comprehensive needs of individuals* or the target patient population and *utilizing the identified needs to design pharmaceutical drug products* that provide the best overall benefit to risk profile for that target patient population over the intended duration of treatment.”

Stegemann *et al.* Defining Patient Centric Pharmaceutical Drug Product Design. AAPS journal 18(5) 2016.

ECMC  
2022

The 8th International Electronic  
Conference on Medicinal Chemistry  
01–30 NOVEMBER 2022 | ONLINE





# Introduction

Patient

Medical condition  
Patient conditions  
Therapeutic conditions

Drug

Drug profile  
Clinical efficacy  
Drug safety

Drug product

Product requirements  
Manufacturing requirements  
Supply chain requisites  
Market access criteria/regulatory

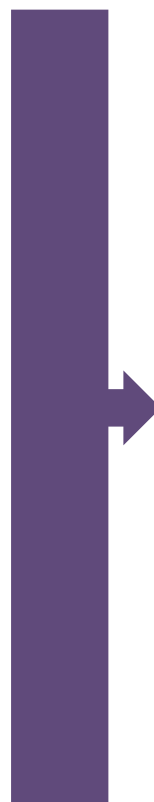

**TARGET PRODUCT PROFILE  
(TPP)**

Stegemann *et al.* Rational and practical considerations to guide a target product profile for patient-centric drug product development with measurable patient outcomes – A proposed roadmap. AAPS journal 18(5) 2016.

ECMC  
2022

**The 8th International Electronic  
Conference on Medicinal Chemistry**  
01–30 NOVEMBER 2022 | ONLINE



# Introduction

| PATIENT-RELATED CHARACTERISTICS | EXAMPLES                                               |
|---------------------------------|--------------------------------------------------------|
| Age                             | Organ and body functions, social-emotional development |
| Visual impairment               | Blindness                                              |
| Motoric impairment              | Arm mobility, difficulty walking, manual dexterity     |
| Swallowing impairment           | Dysphagia                                              |
| Cognitive impairment            | Memory loss, dementia                                  |
| Poor hand sensitivity           | Control of movement and strenght                       |
| Loss of hearing                 |                                                        |
| Dentition                       |                                                        |
| Health literacy                 |                                                        |
| Psychological distress          | Negative perception, depressive disorders              |
| Disease state                   | Comorbidities, disease disability                      |
| PK/PD                           | Kidney clearance                                       |
| Psychosocial issues             | Way of living, Employment satus, access to caregivers  |

Stegemann *et al.* Defining Patient Centric Pharmaceutical Drug Product Design. AAPS journal 18(5) 2016.

ECMC  
2022

The 8th International Electronic  
Conference on Medicinal Chemistry  
01-30 NOVEMBER 2022 | ONLINE

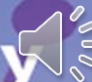

# Introduction

| PRODUCT-RELATED CHARACTERISTICS            | EXAMPLES                                                                    |
|--------------------------------------------|-----------------------------------------------------------------------------|
| Route of administration                    | Oral, inhalation, rectal, vaginal, dermal                                   |
| Product strength concentration             |                                                                             |
| Type of dosage form                        | Tablet, oral solution, ointment                                             |
| Site of dermal application                 | Arm, feet, back                                                             |
| Appearance                                 | Product size, shape, colour, embossing                                      |
| Swallowability                             | Related to tablet size, shape, coating/waxing, liquid viscosity, mouth feel |
| Dose to therapeutic effect                 | Number of tablets, total volume of liquid                                   |
| Dosing regimen                             | Dosing frequency, duration of treatment                                     |
| Packaging                                  | Inner/outer, labelling                                                      |
| Container closure system                   |                                                                             |
| Dosing and administration devices          | Syringes, applicator                                                        |
| Any handlings to be conducted prior to use | Opening capsules, measuring liquids                                         |
| Instructions for use                       | Complexity                                                                  |
| Caregiver assistance                       |                                                                             |

Stegemann *et al.* Defining Patient Centric Pharmaceutical Drug Product Design. AAPS journal 18(5) 2016.

ECMC  
2022

The 8th International Electronic  
Conference on Medicinal Chemistry  
01–30 NOVEMBER 2022 | ONLINE



# Introduction

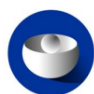

EUROPEAN MEDICINES AGENCY  
SCIENCE MEDICINES HEALTH

15 October 2020  
EMA/CHMP/QWP/292439/2017  
Committee for Medicinal Products for Human Use (CHMP)

Reflection paper on the pharmaceutical development of  
medicines for use in the older population

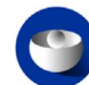

EUROPEAN MEDICINES AGENCY  
SCIENCE MEDICINES HEALTH

1 August 2013  
EMA/CHMP/QWP/805880/2012 Rev. 2  
Committee for Medicinal Products for Human Use (CHMP)  
Paediatric Committee (PDCO)

Guideline on pharmaceutical development of medicines  
for paediatric use

ECMC  
2022

The 8th International Electronic  
Conference on Medicinal Chemistry

01–30 NOVEMBER 2022 | ONLINE

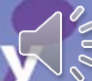

# Introduction

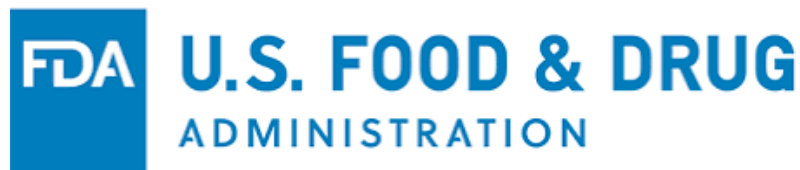

---

## Patient-Focused Drug Development: Collecting Comprehensive and Representative Input

Guidance for Industry, Food and Drug Administration Staff, and Other Stakeholders

U.S. Department of Health and Human Services  
Food and Drug Administration  
Center for Drug Evaluation and Research (CDER)  
Center for Biologics Evaluation and Research (CBER)

June 2020

---

---

## Patient-Focused Drug Development: Methods to Identify What Is Important to Patients

Guidance for Industry, Food and Drug Administration Staff, and Other Stakeholders

U.S. Department of Health and Human Services  
Food and Drug Administration  
Center for Drug Evaluation and Research (CDER)  
Center for Biologics Evaluation and Research (CBER)

February 2022  
Procedural

---

## Patient-Focused Drug Development: Selecting, Developing, or Modifying Fit-for-Purpose Clinical Outcome Assessments

Guidance for Industry, Food and Drug Administration Staff, and Other Stakeholders

*DRAFT GUIDANCE*

This guidance document is being distributed for comment purposes only.

Comments and suggestions regarding this draft document should be submitted within 90 days of publication in the *Federal Register* of the notice announcing the availability of the draft guidance. Submit electronic comments to <http://www.regulations.gov>. Submit written comments to the Dockets Management Staff (HFA-305), Food and Drug Administration, 5630 Fishers Lane, rm. 1061, Rockville, MD 20852. All comments should be identified with the docket number listed in the notice of availability that publishes in the *Federal Register*.

For questions regarding this draft document, contact (CDER) Office of Communications, Division of Drug Information at [druginfo@fda.hhs.gov](mailto:druginfo@fda.hhs.gov), 855-543-3784 or 301-796-3400; or (CBER) Office of Communication, Outreach and Development at [ocod@fda.hhs.gov](mailto:ocod@fda.hhs.gov), 800-835-4709 or 240-402-8010; or Office of Strategic Partnerships and Technology Innovation, Center for Devices and Radiological Health at [cdrih-pro@fda.hhs.gov](mailto:cdrih-pro@fda.hhs.gov), 800-638-2041 or 301-796-7100.

U.S. Department of Health and Human Services  
Food and Drug Administration  
Center for Drug Evaluation and Research (CDER)  
Center for Biologics Evaluation and Research (CBER)  
Center for Devices and Radiological Health (CDRH)

June 2022  
Procedural

---

ECMC  
2022

The 8th International Electronic  
Conference on Medicinal Chemistry

01-30 NOVEMBER 2022 | ONLINE



# Introduction

## Special populations

Paediatrics

Geriatrics

Dermatological patients

**ECMC**  
**2022**

**The 8th International Electronic  
Conference on Medicinal Chemistry**

01-30 NOVEMBER 2022 | ONLINE

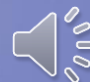

# Introduction

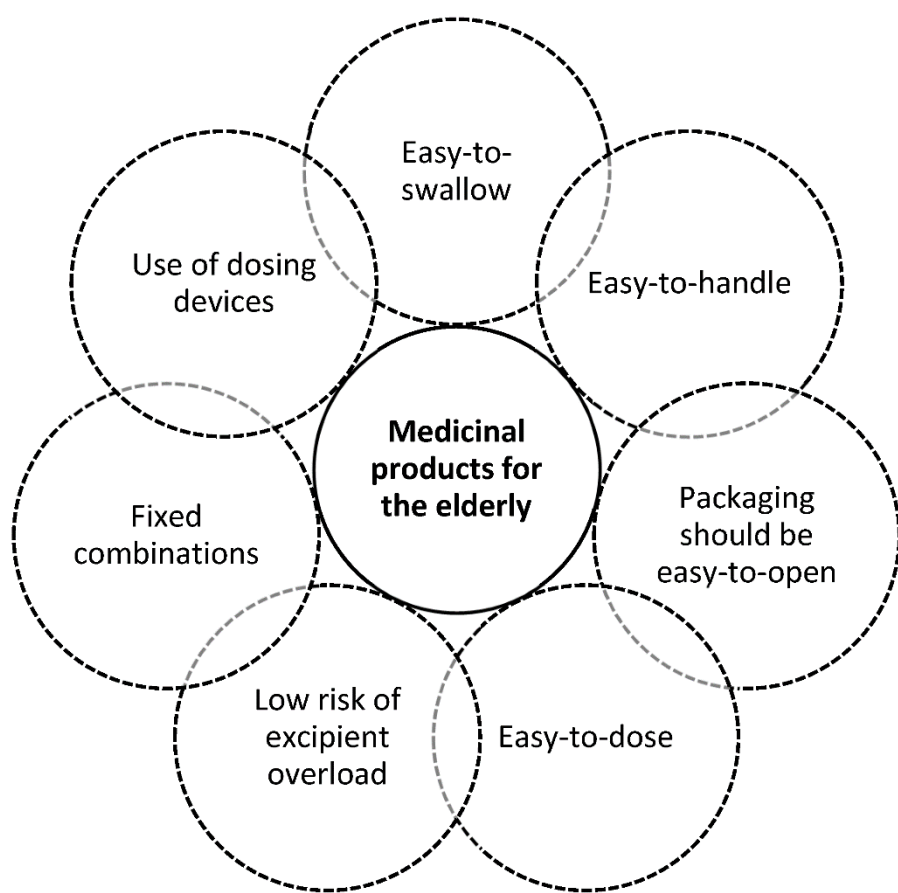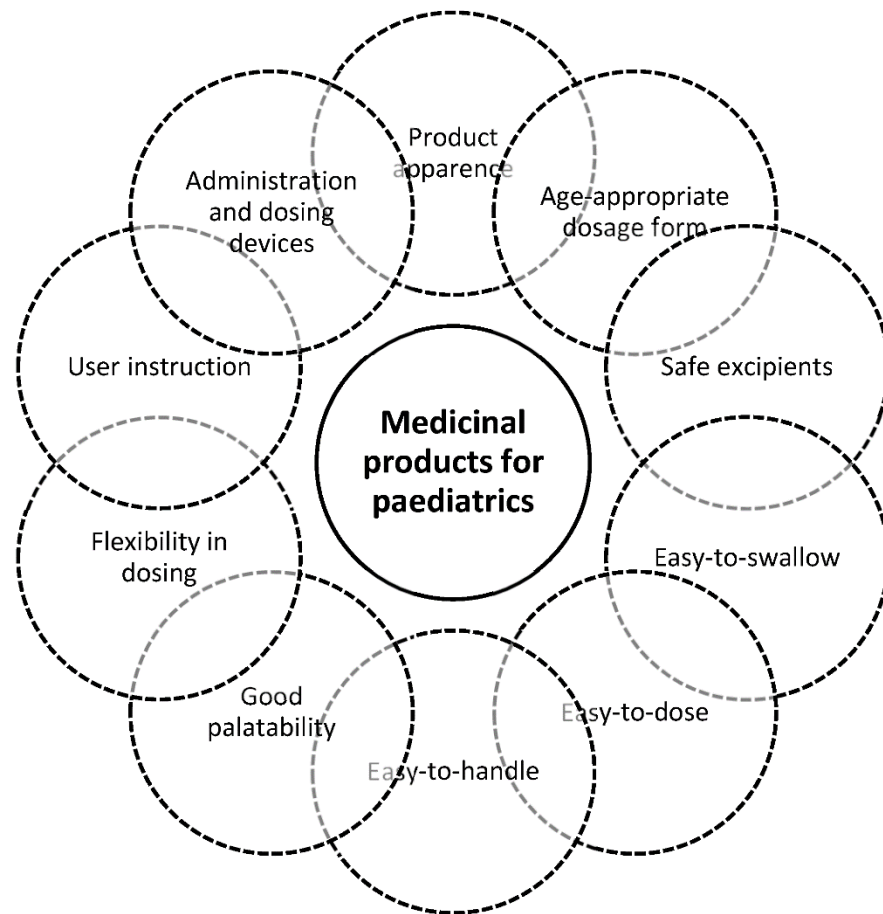

Menditto E, Almeida IF et al. Patient centric pharmaceutical drug product design-the impact on medication adherence. *Pharmaceutics*. 2020; 12(1):44.



# Introduction

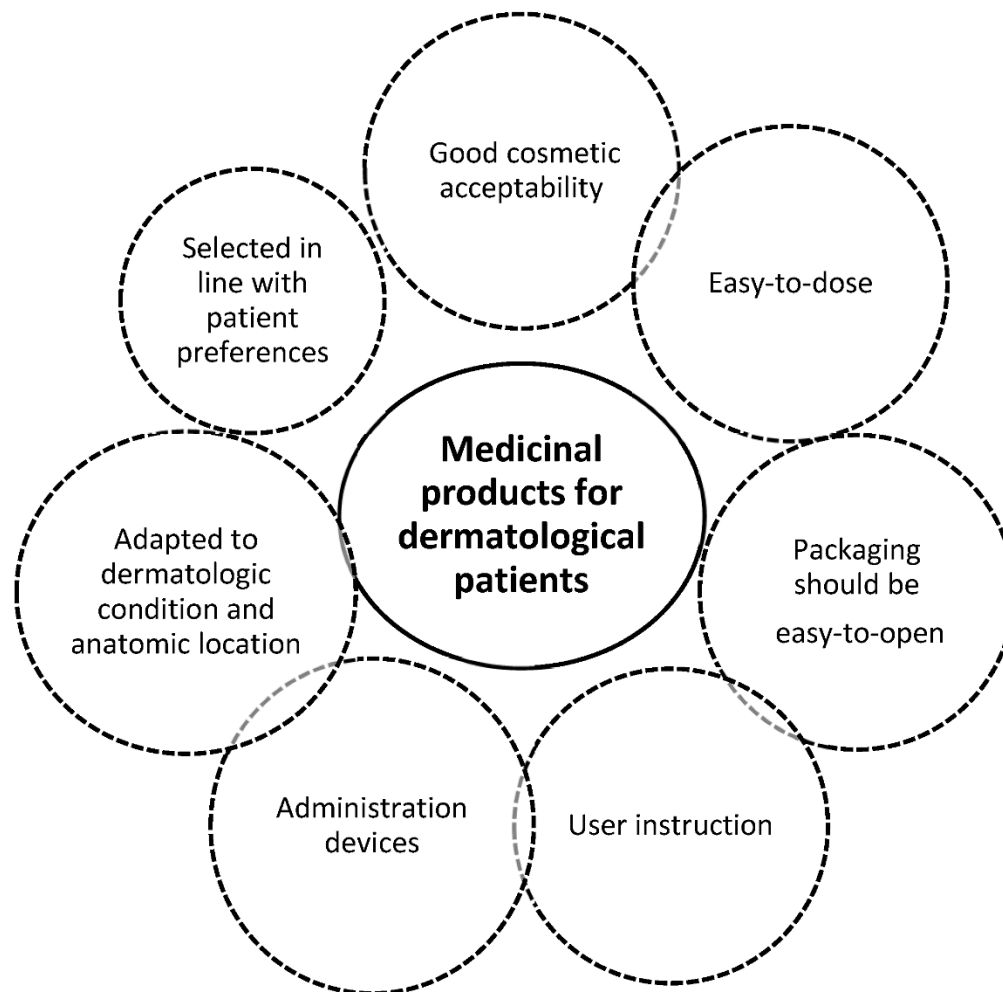

Menditto E, Almeida IF et al. Patient centric pharmaceutical drug product design-the impact on medication adherence. *Pharmaceutics*. 2020; 12(1):44.

ECMC  
2022

The 8th International Electronic  
Conference on Medicinal Chemistry

01-30 NOVEMBER 2022 | ONLINE





# Results and discussion

## CASE STUDIES

### CHRONIC SKIN DISORDERS

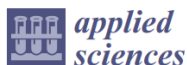

Article

#### Design of an Emulgel for Psoriasis Focused on Patient Preferences

Rita Sanches Oliveira <sup>1</sup>, Diva Ferraz da Silva <sup>2</sup>, Sandra Mota <sup>2,3</sup>, Jorge Garrido <sup>4,\*</sup>, Emelinda Manuela Garrido <sup>4</sup>, José Manuel Sousa Lobo <sup>2,3</sup> and Isabel Filipa Almeida <sup>2,3,\*</sup>

### ORAL PEDIATRIC FORMULATION FOR BITTER API

Article

#### Overcoming challenges in pediatric formulation with a patient-centric design approach

John Dike N. Ogbonna <sup>1,2</sup>, E. Cunha <sup>3\*</sup>, Anthony A. Attama <sup>1</sup>, Kenneth C. Ofokansi <sup>1</sup>, H Ferreira <sup>4</sup>, S Pinto <sup>5</sup>, J Gomes <sup>5</sup>, Ítala M.G. Marx <sup>6,7</sup>, António M. Peres <sup>6,7</sup>, JM Sousa Lobo <sup>8,9</sup> and Isabel Martins de Almeida <sup>8,9\*</sup>

ECMC  
2022

The 8th International Electronic  
Conference on Medicinal Chemistry  
01–30 NOVEMBER 2022 | ONLINE

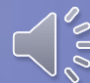

# Results and discussion

## CHRONIC SKIN DISORDERS

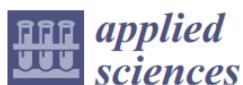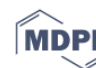

*Article*

### **Design of an Emulgel for Psoriasis Focused on Patient Preferences**

Rita Sanches Oliveira <sup>1</sup>, Diva Ferraz da Silva <sup>2</sup>, Sandra Mota <sup>2,3</sup> , Jorge Garrido <sup>4,\*</sup> ,  
Ermelinda Manuela Garrido <sup>4</sup>, José Manuel Sousa Lobo <sup>2,3</sup>  and Isabel Filipa Almeida <sup>2,3,\*</sup> 

**ECMC  
2022**

**The 8th International Electronic  
Conference on Medicinal Chemistry**  
01–30 NOVEMBER 2022 | ONLINE

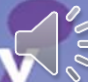

# Results and discussion

## Patient preferences for topical attributes of anti-psoriatic medicines N= 79

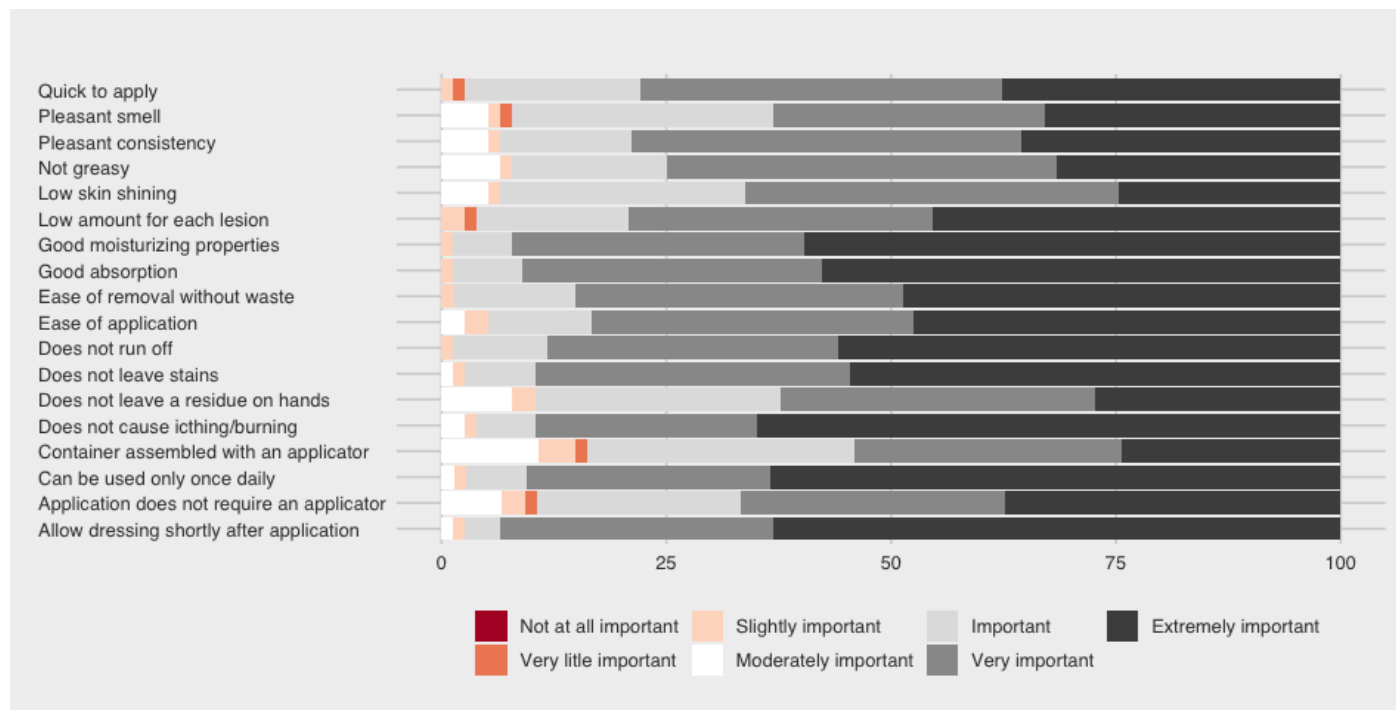

Vasconcelos V, Almeida IF et al. Patient preferences for attributes of topical anti-psoriatic medicines. *J Dermatolog Treat.* 2019; 30(7):659-663.

ECMC  
2022

The 8th International Electronic  
Conference on Medicinal Chemistry  
01-30 NOVEMBER 2022 | ONLINE

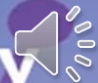

# Results and discussion

Frequency of patients that rated the attribute at least as very important

| DOMAIN      | ATTRIBUTE                                  | %  |
|-------------|--------------------------------------------|----|
| Formulation | Allow dressing shortly after application   | 93 |
| Formulation | Good moisturizing properties               | 92 |
| Application | Once daily regimen                         | 91 |
| Formulation | Good absorption                            | 91 |
| Formulation | Does not leave stains                      | 90 |
| Formulation | Does not cause itching/burning             | 90 |
| Application | Does not run off                           | 88 |
| Container   | Ease of removal without waste              | 85 |
| Application | Ease of application                        | 83 |
| Formulation | Pleasant consistency                       | 79 |
| Application | Low amount for each lesion                 | 79 |
| Application | Quick to apply                             | 78 |
| Formulation | Not greasy                                 | 75 |
| Formulation | Low skin shining                           | 67 |
| Container   | Application does not require an applicator | 66 |
| Formulation | Pleasant smell                             | 63 |
| Formulation | Does not leave a residue on hands          | 62 |
| Container   | Container assembled with an applicator     | 51 |

Vasconcelos V, Almeida IF et al. Patient preferences for attributes of topical anti-psoriatic medicines. *J Dermatolog Treat.* 2019; 30(7):659-663.

ECMC  
2022

The 8th International Electronic  
Conference on Medicinal Chemistry  
01-30 NOVEMBER 2022 | ONLINE

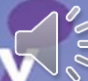

## Results and discussion

### Target Product Profile (TPP)

Low skin residue  
Quick absorption  
Minimum clothes staining  
Moisturizing properties

**EMULGEL**

**Benchmarking**

Ointment, Cream, Solution

**Anti-inflammatory drug:** Bethametasone dipropionate

ECMC  
2022

The 8th International Electronic  
Conference on Medicinal Chemistry

01-30 NOVEMBER 2022 | ONLINE

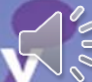

# Results and discussion

TPP

Low skin residue

Minimum clothes staining

Quick absorption

Moisturizing

Low amount of lipophilic ingredients

Non petrolatum-derived ingredients  
Aqueous external phase

Humectants  
Hyaluronic acid

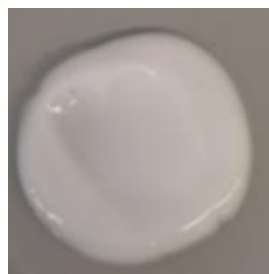

| COMPOUND                   | wt %    |
|----------------------------|---------|
| Betamethasone dipropionate | 0,064   |
| Almond oil                 | 9.0     |
| Tween® 80                  | 1.0     |
| Glycerin                   | 7.5     |
| Sodium hyaluronate         | 1.0     |
| Carbopol® 980              | 0.7     |
| Methylparaben solution     | 3.0     |
| Triethanolamine            | qs pH 6 |
| Water                      | qs 100  |

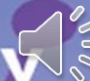

# Results and discussion

Fabric

Petrolatum

Emulgel

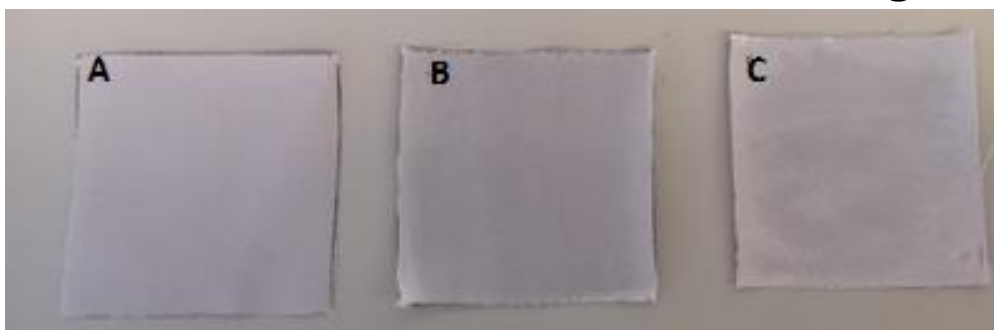

FABRIC STAINING

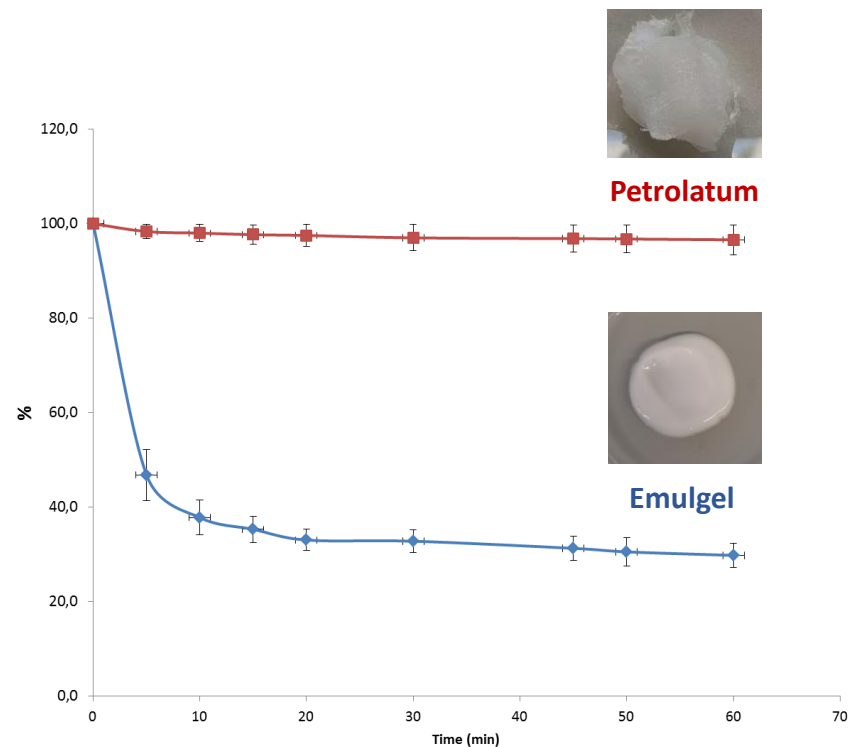

EVAPORATION RATE



## Results and discussion

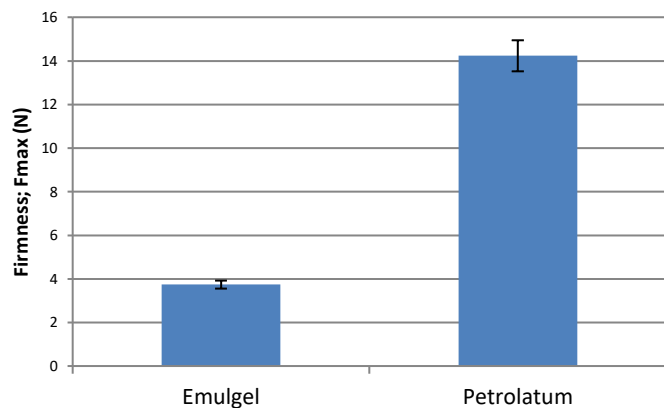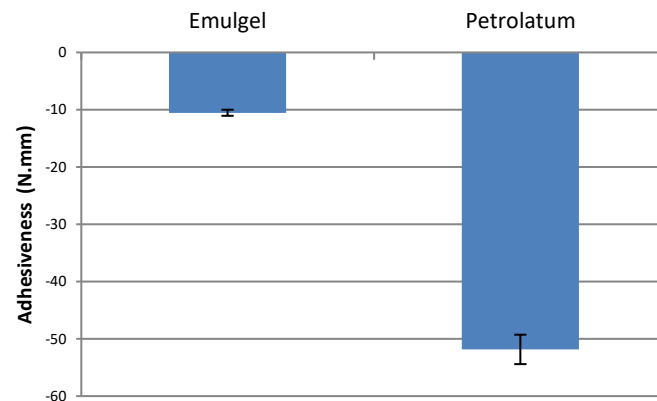

Firmness and adhesiveness (20°C, mean values  $\pm$ SD, n = 3)

### TEXTURAL PROPERTIES





# Results and discussion

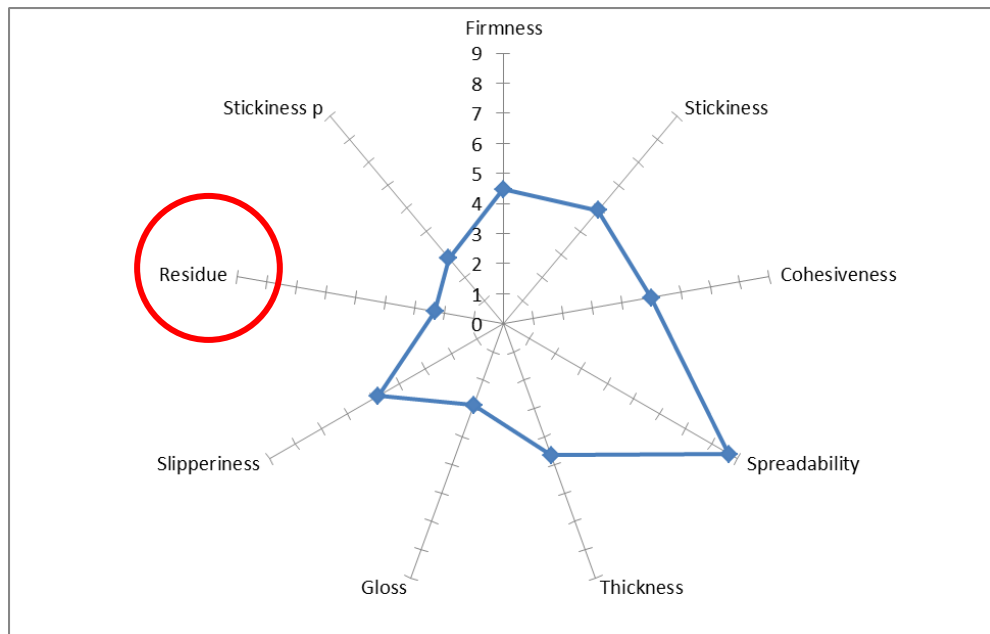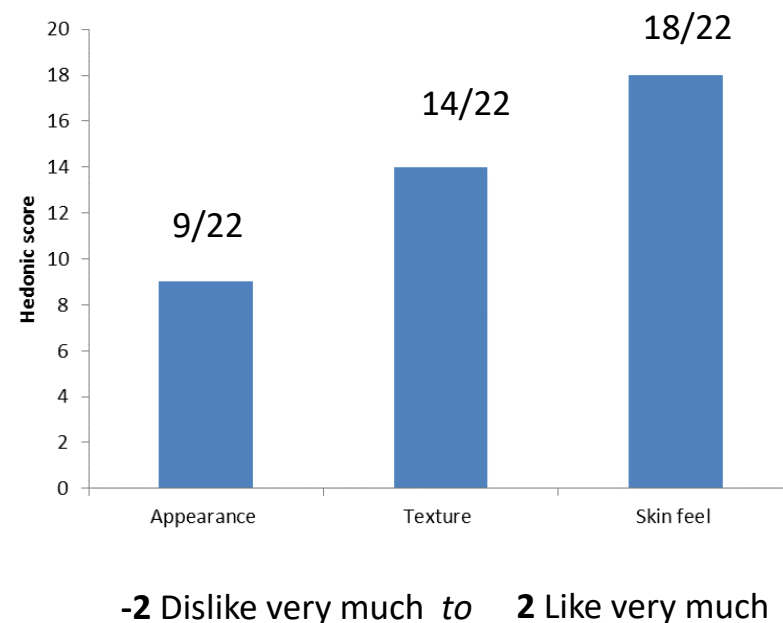

EXPLORATORY SENSORY ANALYSIS N=11

ECMC  
2022

The 8th International Electronic  
Conference on Medicinal Chemistry  
01-30 NOVEMBER 2022 | ONLINE



## Results and discussion

# CASE STUDIES

### ORAL PEDIATRIC FORMULATION FOR BITTER API

*Article*

## Overcoming challenges in pediatric formulation with a patient-centric design approach

John Dike N. Ogbonna <sup>1,2</sup>, E. Cunha <sup>3\*</sup>, Anthony A. Attama <sup>1</sup>, Kenneth C. Ofokansi <sup>1</sup>, H Ferreira <sup>4</sup>, S Pinto <sup>5</sup>, J Gomes <sup>5</sup>, Ítala M.G. Marx <sup>6,7</sup>, António M. Peres <sup>6,7</sup>, JM Sousa Lobo <sup>8,9</sup> and Isabel Martins de Almeida <sup>8,9\*</sup>

ECMC  
2022

The 8th International Electronic  
Conference on Medicinal Chemistry  
01-30 NOVEMBER 2022 | ONLINE



## Results and discussion

### ORAL PEDIATRIC FORMULATION FOR BITTER DRUGS (Ranitidine as model of bitter API)

#### Target Product Profile (TPP)

Good palatability (sugar-free)

Easy to dose

Dosing flexibility

Safe excipients

Easy preparation in a hospital setting

ORAL SOLUTION WITH A  
SUITABLE TASTE-MASKING  
STRATEGY



# Results and discussion

## ORAL PEDIATRIC SOLUTION

| CHARACTERISTIC                         | TARGET                                    | COMMENT                                                                                                                                                                                   |
|----------------------------------------|-------------------------------------------|-------------------------------------------------------------------------------------------------------------------------------------------------------------------------------------------|
| Concentration                          | 25 mg/mL                                  | Allows a low administration volume                                                                                                                                                        |
| pH                                     | 4.5-5.5                                   | pH of maximum stability of Ra-HCl                                                                                                                                                         |
| Chemical and microbiological stability | At least 30 days                          | Comparison between solution in closed recipient and solution with once daily sample removal (in-use stability)                                                                            |
| Flavor                                 | Bubble gum                                | One of the preferred flavors for children                                                                                                                                                 |
| Taste masking strategy                 | Sweeteners and sodium chloride            | Synergistic effect of aspartame and sodium saccharine<br>Sodium chloride affords bitterness masking                                                                                       |
| Viscosity                              | Very fluid                                | Appropriated for administration with a syringe                                                                                                                                            |
| Excluded excipients                    | Sugar-free, alcohol-free and paraben free | Parabens and alcohol are not recommended for pediatric formulations. Sugar-free formulation is non-cariogenic and suitable for children with diabetes and hereditary fructose intolerance |
| Preparation                            | Simple, with low energy consumption       | Feasible in a hospital pharmacy setting                                                                                                                                                   |



## Results and discussion

### ORAL PEDIATRIC SOLUTION

| Compound          | wt % |
|-------------------|------|
| Sodium saccharin  | 0.6  |
| Sorbic acid       | 0.1  |
| Potassium sorbate | 0.1  |
| Sorbitol 70%      | 5    |
| Citric acid       | 0.1  |
| Aspartame         | 0.3  |
| Sodium chloride   | 0.1  |
| Sodium citrate    | 0.5  |

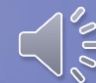

# Results and discussion

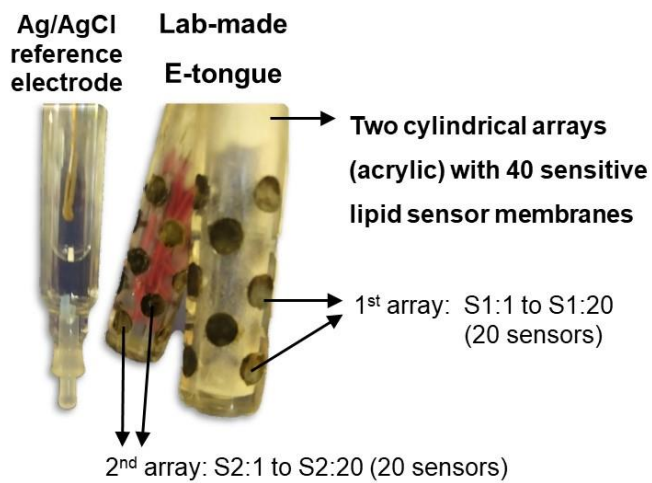

E-tongue

## ORAL PEDIATRIC SOLUTION

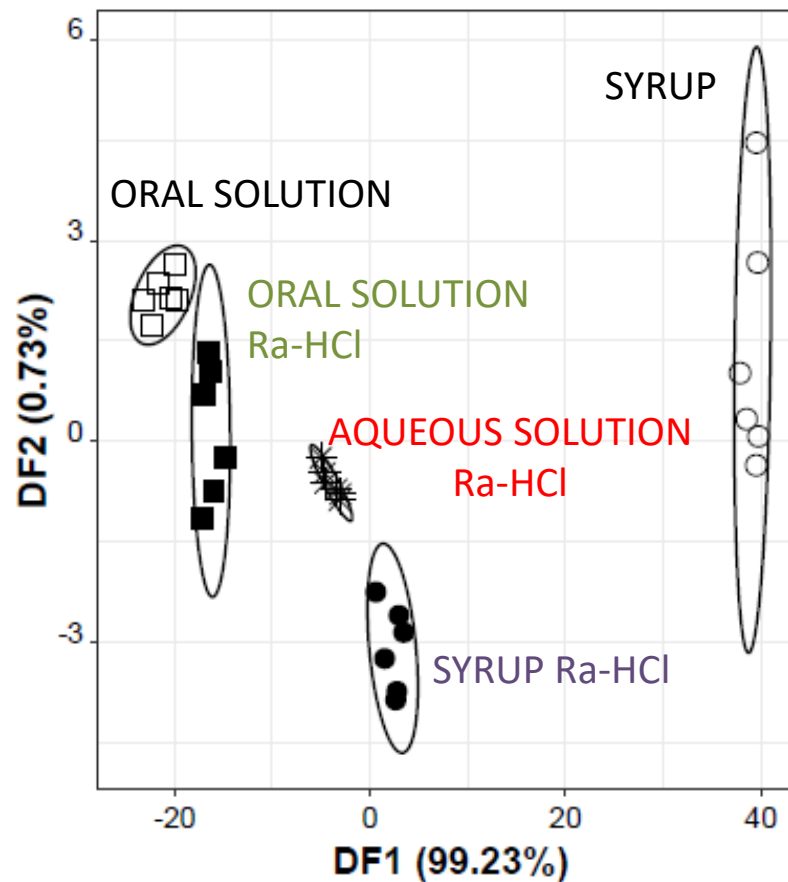

# Conclusions

## ROADMAP

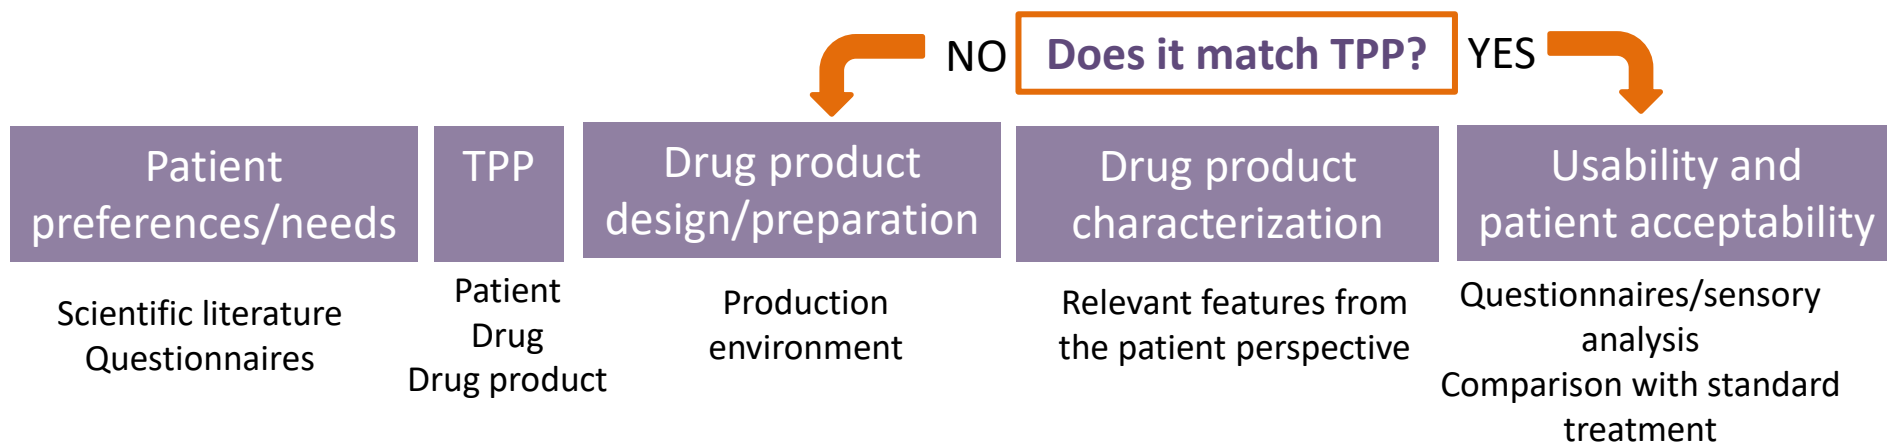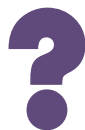

Does the use of medicines designed to match patient preferences and needs translate into higher treatment adherence?

ECMC  
2022

The 8th International Electronic  
Conference on Medicinal Chemistry  
01-30 NOVEMBER 2022 | ONLINE

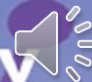

# PATIENT CENTRIC ANTI-PSORIATIC TOPICAL FORMULATION DESIGN

Jorge Garrido

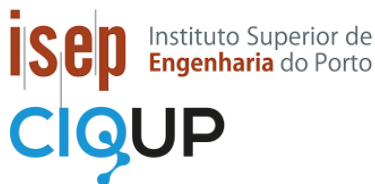

Sandra Mota

Marta Pedroso

Diva Silva

Isabel Almeida

José Manuel Sousa Lobo

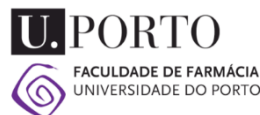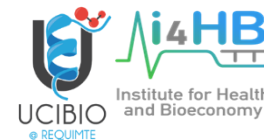

Rita Oliveira

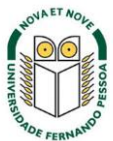

# PATIENT CENTRIC PEDIATRIC ORAL FORMULATION DESIGN

John Ogonna

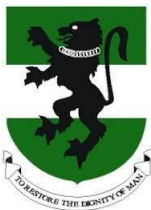

Anthony Attama

Keneth Ofokansi

Susana Pinto

Joana Gomes

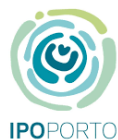

Isabel Almeida

Helena Ferreira

José Manuel Sousa Lobo

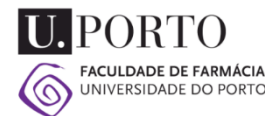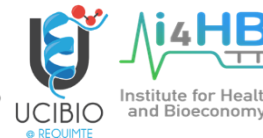

António Peres  
Ítala Marx

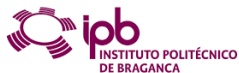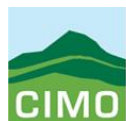

Centro de  
Investigação  
de Montanha

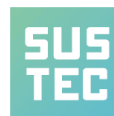

Associate  
Laboratory for  
Sustainability and  
Technology in  
Mountain Regions

Edite Cunha

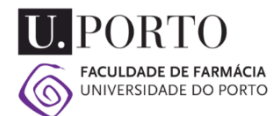

ECMC  
2022

The 8th International Electronic  
Conference on Medicinal Chemistry  
01-30 NOVEMBER 2022 | ONLINE



# Acknowledgments

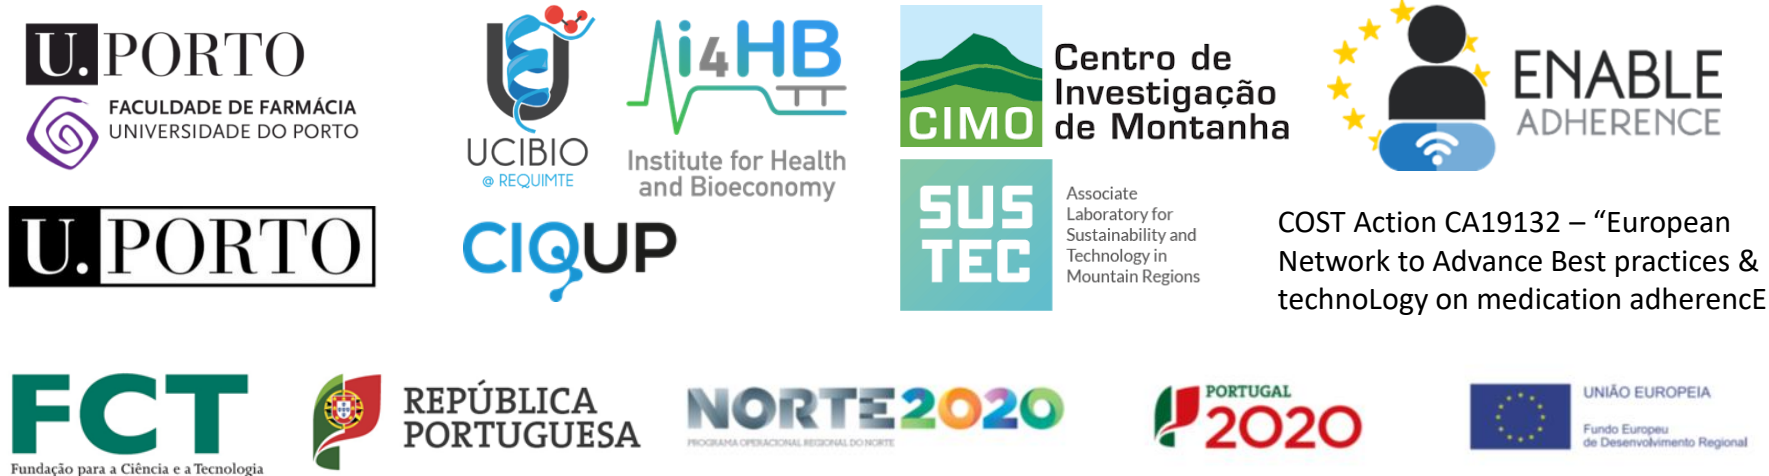

This work was supported by national funds from FCT—Fundação para a Ciência e a Tecnologia, I.P., Portugal, in the scope of the project UIDP/04378/2020 and UIDB/04378/2020 of the Research Unit on Applied Molecular Biosciences—UCIBIO, the project LA/P/0140/2020 of the Associate Laboratory Institute for Health and Bioeconomy—i4HB, the project UIDB/00690/2020 and UIDP/00690/2020 of CIMO and the project LA/P/0007/2020 of the Associate Laboratory SusTEC, the project UIDB/00081/2020 of IMS-CIQUP and by the Federal Government of Nigeria NEEDS Assessment grant-2018. Ítala M.G. Marx also acknowledges the Ph.D. research grant (SFRH/BD/137283/2018) provided by FCT. S. Mota acknowledges the research fellowship (NORTE-01-0247-FEDER-047239) fully supported by national funding by project 47239 - Cork2Cosmetic (NORTE-01-0247-FEDER-047239).

ECMC  
2022

The 8th International Electronic  
Conference on Medicinal Chemistry

01-30 NOVEMBER 2022 | ONLINE

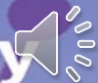

Supplement: s1 [file s1]
